# Supplementary material for: Effect of electronic coupling on the electrocatalytic performance of platinum metal
Source: Royal Society of Chemistry journal article supplement (doi:10.1039/c6ra16626a), 2016-01-01
Supplement: c6ra16626a1.pdf [file c6ra16626a1.pdf]

## Electronic Supplementary Information

### **Effect of electronic coupling on the eletctrocatalytic performance of platinum metal**

Yan Feng,<sup>a,b</sup> Caixia Wang,<sup>a</sup> Feng Ye,<sup>a</sup> Hui Liu<sup>a,c,\*</sup> and Jun Yang<sup>a,c,\*</sup>

<sup>a</sup>State Key Laboratory of Multiphase Complex Systems, Institute of Process Engineering, Chinese Academy of Sciences, Beijing 100190, China. Fax: 86-10-8254 4915; Tel: 86-10-8254 4917; Email: liuhui@ipe.ac.cn (H.L.); Fax: 86-10-8254 4915; Tel: 86-10-8254 4915; E-mail: [jyang@ipe.ac.cn](mailto:jyang@ipe.ac.cn) (J.Y.)

<sup>b</sup>University of Chinese Academy of Sciences, No. 19A Yuquan Road, Beijing 100049, China

<sup>c</sup>Center for Mesoscience, Institute of Process Engineering, Chinese Academy of Sciences, Beijing 100190, China

Financial support from National Natural Science Foundation of China (Nos.: 21376247, 21476246, 21406231, 21506225, 21573240) and Center for Mesoscience, Institute of Process Engineering, Chinese Academy of Sciences (COM2015A001) is gratefully acknowledged.

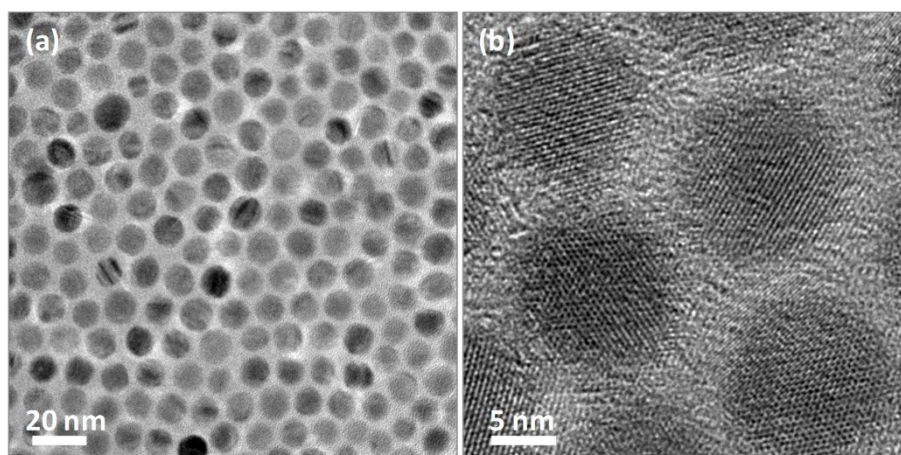

**Fig. S1** TEM image (a) and HRTEM image (b) of Ag seed particles with single crystal phase prepared by  $\text{NaBH}_4$  reduction of  $\text{AgNO}_3$  in aqueous solution.

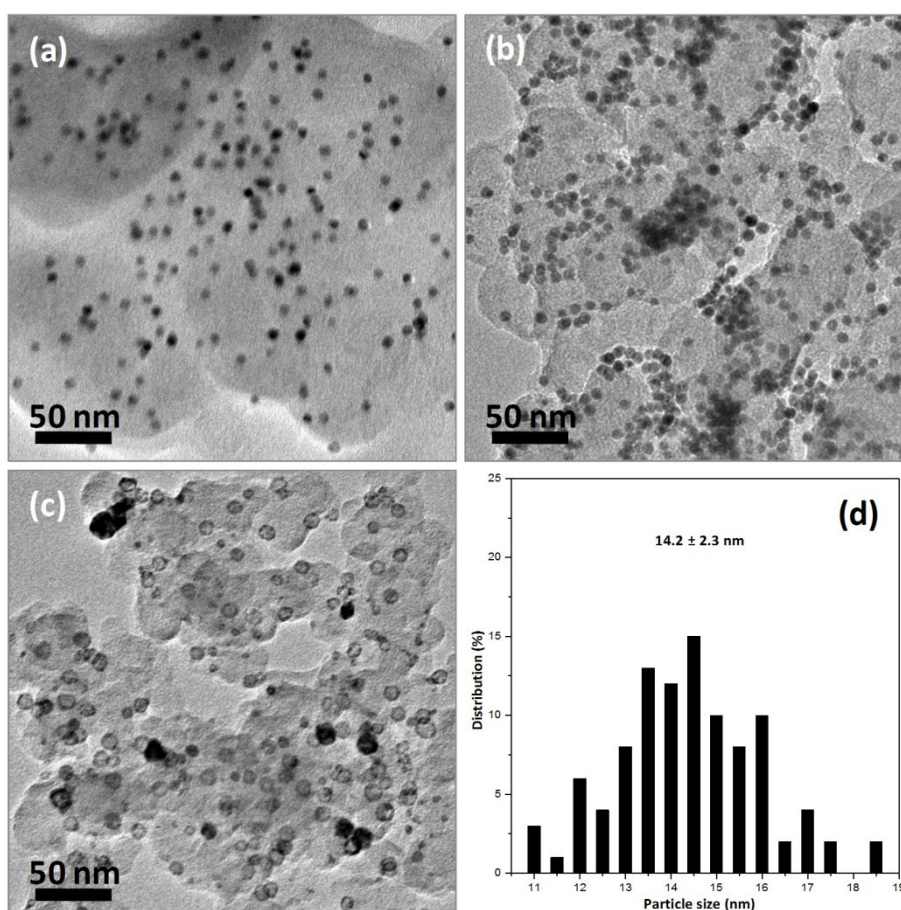

**Fig. S2** TEM images of core-shell Ag-Pt (a), core-shell Au-Pt (b), and hollow structured Pt nanoparticles (c) loaded on Vulcan carbon supports, and histogram to show the size distribution of hollow Pt nanoparticles (d).

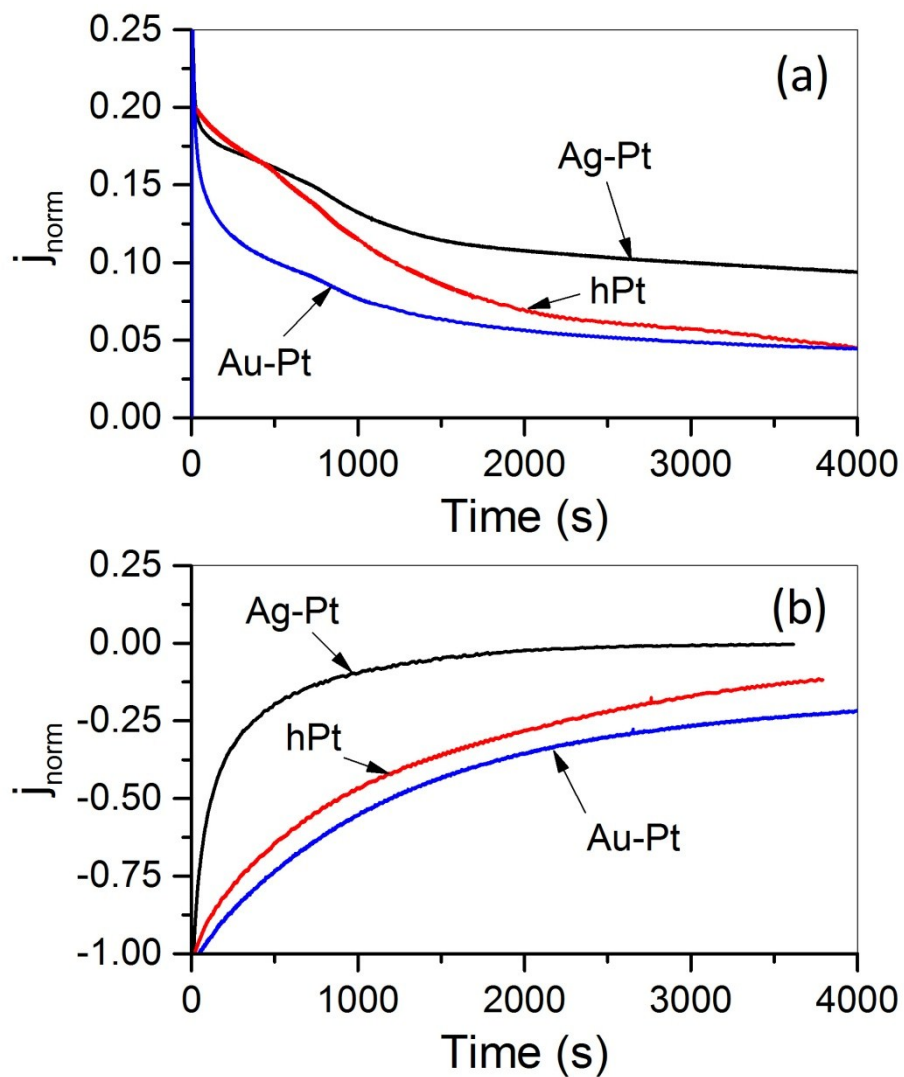

**Fig. S3** Chronoamperograms of core-shell Ag-Pt, Au-Pt, and hollow Pt nanoparticles at 0.45 V vs Ag/AgCl at room temperature in argon-purged 0.1 M  $\text{HClO}_4$  with 1 M methanol (a); chronoamperograms at 0.45 V (c) over core-shell Ag-Pt, Au-Pt, and hollow Pt nanoparticles in  $\text{O}_2$  saturated 0.1 M  $\text{HClO}_4$  electrolyte at a scan rate of  $20 \text{ mV s}^{-1}$  and a rotating rate of 1600 rpm (b).

**Table S1.** Electrochemical measurements of methanol oxidation on hollow Pt, core-shell Ag-Pt, and Au-Pt nanoparticles.

| Catalyst  | FPP (V) | FPCD (mA cm <sup>-2</sup> ) | BPP (V) | BPCD (mA cm <sup>-2</sup> ) |
|-----------|---------|-----------------------------|---------|-----------------------------|
| Hollow Pt | 0.69    | 32.8                        | 0.55    | 25.4                        |
| Ag-Pt     | 0.72    | 43.7                        | 0.60    | 39.9                        |
| Au-Pt     | 0.73    | 28.7                        | 0.62    | 22.9                        |

FPP: Forward peak potential; FPCD: Forward peak current density; BPP: Backward peak potential;

BPCD: Backward peak current density. The data were obtained from Figure 4b.

**Table S2.** Comparison of the catalytic activity of hollow Pt, core-shell Ag-Pt, and Au-Pt nanoparticles for the oxygen reduction. The data were obtained from Figure 4c.

| Material  | Half-Wave Potential at 1600 rpm (V) | Kinetic Current Density at Half-Wave Potential (mA·cm <sup>-2</sup> ) |
|-----------|-------------------------------------|-----------------------------------------------------------------------|
| Hollow Pt | 0.61                                | 12.6                                                                  |
| Ag-Pt     | 0.57                                | 7.71                                                                  |
| Au-Pt     | 0.65                                | 14.7                                                                  |
